# Supplementary material
Source: publisher site journal article supplement (https://www.dovepress.com/article/558893)
Supplement: Supplementary file 1 [file 558893%20Revised%20Supplementary%20Materials.pdf]

**Supplementary File**

**Supplementary Table 1: Sensitivity analyses using continuous DKSA scores**

| **Outcome Variable** | **Spearman rho** | **p-value** | **Standardized β (Regression)** | **p-value** |
| --- | --- | --- | --- | --- |
| BMI (kg/m²) | –0.164 | 0.026* | –0.103 | 0.164 |
| Neck circumference (cm) | –0.105 | 0.157 | –0.122 | 0.099 |
| Total cholesterol (mg/dL) | –0.118 | 0.112 | –0.056 | 0.448 |
| Triglyceride (mg/dL) | –0.155 | 0.036* | 0.047 | 0.531 |

*Significant at p < 0.05.

**Supplementary Table 2: SEM-Based estimates of variance and covariance parameter**

|  |  |  |  | **%95 Confidence Intervals** | |  |  |  |
| --- | --- | --- | --- | --- | --- | --- | --- | --- |
| **Variable 1** | **Variable 2** | **Estimate** | **SE** | **Lower** | **Upper** | **β** | **z** | **p** |
| Neck circumference (cm) | BMI (kg/m2) | 8.31 | 1.65 | 5.06 | 11.55 | 0.39 | 5.02 | **< .001** |
| Total cholesterol (mg/dL) | Triglyceride (mg/dL) | 1646.99 | 265.34 | 1126.92 | 2167.05 | 0.51 | 6.20 | **< .001** |
| Complication | Comorbidity | 0.00 | 0.00 | -0.00 | 0.014 | 0.05 | 0.74 | 0.456 |
| Neck circumference (cm) | Neck circumference (cm) | 12.64 | 1.318 | 10.06 | 15.2 | 0.98 | 9.59 | **< .001** |
| BMI (kg/m2) | BMI (kg/m2) | 34.42 | 3.58 | 27.389 | 41.45 | 0.97 | 9.59 | **< .001** |
| Total cholesterol  (mg/dL) | Total cholesterol (mg/dL) | 2004.81 | 209.01 | 1595.15 | 2414.48 | 0.98 | 9.59 | **< .001** |
| Triglyceride (mg/dL) | Triglyceride (mg/dL) | 5108.88 | 532.63 | 4064.93 | 6152.83 | 0.99 | 9.59 | **< .001** |
| Complication | Complication | 0.041 | 0.00 | 0.03 | 0.05 | 0.99 | 9.59 | **< .001** |
| Comorbidity | Comorbidity | 0.13 | 0.013 | 0.10 | 0.15 | 0.98 | 9.59 | **< .001** |
| Neck circumference (cm) | Total cholesterol (mg/dL) | 15.82 | 11.79 | -7.28 | 38.94 | 0.09 | 1.34 | **0.18** |
| Neck circumference (cm) | Triglyceride (mg/dL) | 52.26 | 19.12 | 14.77 | 89.75 | 0.20 | 2.73 | **0.006** |
| Neck circumference (cm) | Complication | -0.18 | 0.055 | -0.29 | -0.07 | -0.25 | -3.32 | **< .001** |
| Neck circumference (cm) | Comorbidity | 0.00 | 0.094 | -0.18 | 0.18 | 0.00 | 0.02 | 0.979 |
| BMI (kg/m2) | Total cholesterol (mg/dL) | 50.80 | 19.72 | 12.14 | 89.46 | 0.19 | 2.57 | **0.01** |
| BMI (kg/m2) | Triglyceride (mg/dL) | 139.47 | 32.58 | 75.61 | 203.32 | 0.33 | 4.28 | **< .001** |
| BMI (kg/m2) | Complication | -0.23 | 0.08 | -0.41 | -0.06 | -0.19 | -2.62 | **0.009** |
| BMI (kg/m2) | Comorbidity | -0.61 | 0.16 | -0.93 | -0.29 | -0.28 | -3.76 | **< .001** |
| Total cholesterol (mg/dL) | Complication | -0.52 | 0.67 | -1.84 | 0.80 | -0.05 | -0.77 | 0.44 |
| Total cholesterol (mg/dL) | Comorbidity | -1.48 | 1.19 | -3.83 | 0.86 | 0.09 | -1.23 | 0.216 |
| Triglyceride (mg/dL) | Complication | -0.59 | 1.07 | -2.70 | 1.50 | -0.04 | -0.55 | 0.578 |
| Triglyceride (mg/dL) | Comorbidity | -2.94 | 1.91 | -6.69 | 0.81 | -0.11 | -1.53 | 0.125 |
| Knowledge level | Knowledge level | 0.24 | 0.02 | 0.19 | 0.30 | 1.0 | 9.59 | **< .001** |

*Bold values indicate statistically significant estimates (p <0.05).
